# Supplementary material
Source: PubMed Central journal article supplement (PMC4254170)
Supplement: NIHMS632050-supplement.pdf [file NIHMS632050-supplement.pdf]

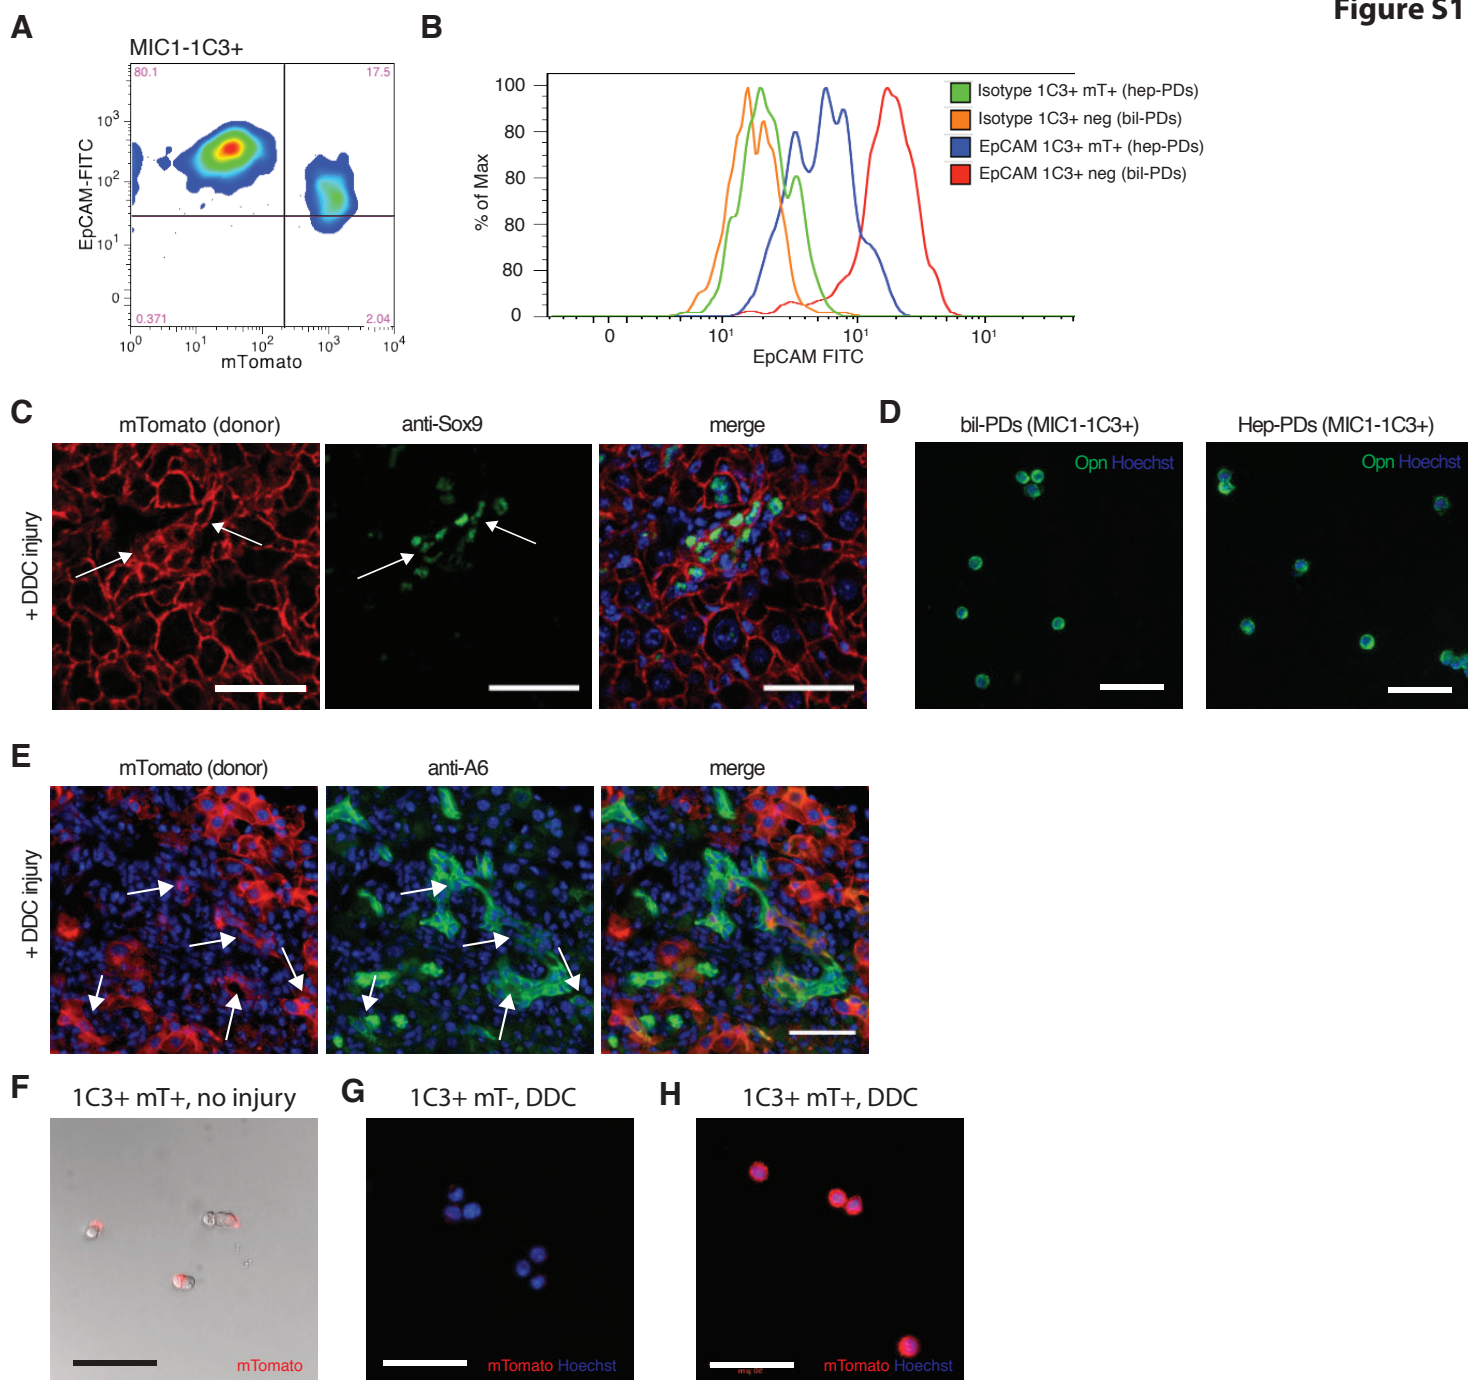

### Figure S1, related to Fig 1: Hepatocyte-derived proliferative ducts express multiple ductal markers

A) EpCAM staining intensity was consistently half-log lower in hepPDs (1C3+ mTomato+) compared with bilPDs (1C3+ mTomato-) by FACS. B) Histogram of EpCAM staining intensity for two ductal populations and isotype controls, respectively (representative plot from 3 biological replicates). C) hepPDs (mTomato+) are Sox9+ and arrange in ducts after 6 weeks DDC treatment D) MIC1-1C3+ FACS isolated ducts derived from biliary epithelium or hepatocytes show equivalent Opn staining intensity. F) Rare MIC1-1C3+ mTomato-high+ trigger-pulse-width low FACS events from an uninjured chimera appeared mTomato+ due to attached membrane fragments and doublet cells and not engraftment of donor progenitors. G) mTomato-negative MIC1-1C3+ or H) mTomato-MIC1-1C3+ from a DDC treated chimeric are shown by comparison (fixed, counterstained).

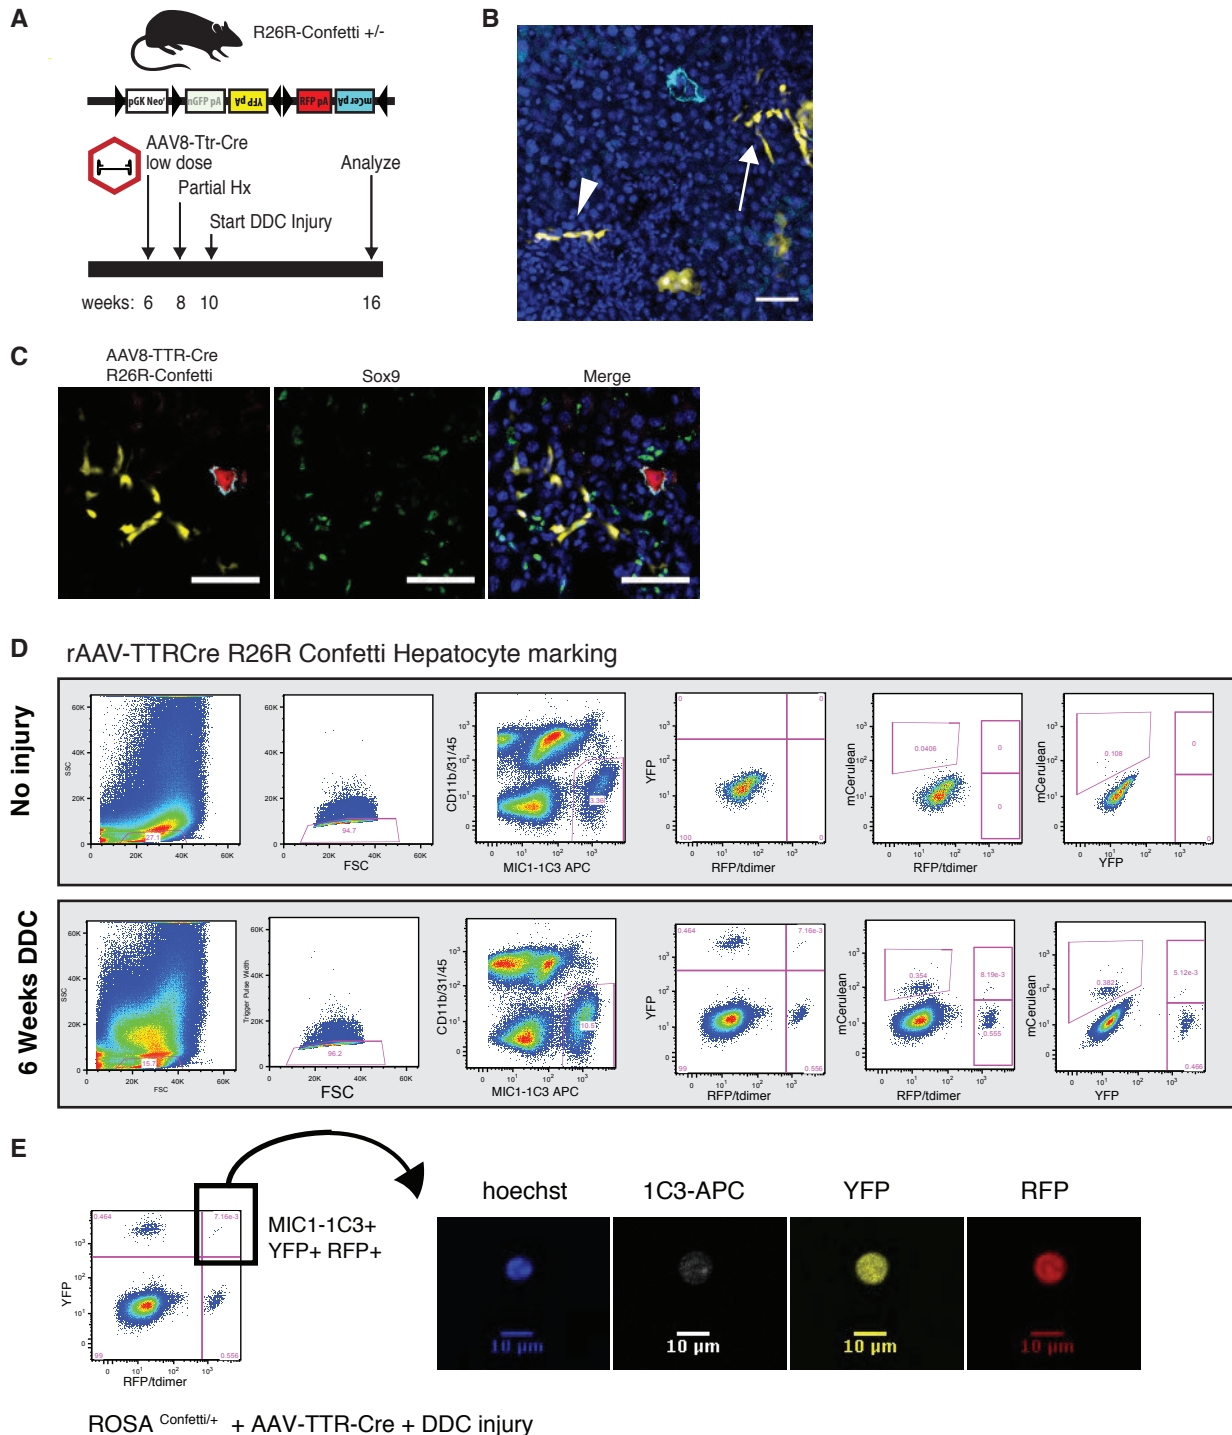

**Figure S2, related to Fig. 2: Hepatocytes labeled with rAAV8 clonally expand and undergo ductal metaplasia**

A) Animals were given low dose rAAV8-Ttr-Cre ( $2 \times 10^{10}$  vg), administered partial hepatectomy to deplete rAAV particles, and 6 weeks 0.1% DDC to initiate an oval cell response. B) Confocal analysis of thick sections indicated single hepatocytes proliferated into clusters of 20-40 cells. Clusters of 24 cells (arrowhead) and >31 cells (arrow) are shown. C) Hepatocyte-derived ductal cells co-expressed Sox9 and Opn (not shown), bars = 50  $\mu$ m. D) FACS based analysis indicated that rAAV-Ttr-Cre did not mark MIC1-1C3 cells without injury (top) but 2% of hepatocytes were marked in this animal (not shown). Following 6 weeks DDC injury (bottom) Cre-marked MIC1-1C3 cells were detected. E) Approximately 1% of hepatocyte-derived progenitors in R26R-Confetti heterozygous mice expressed 2 colors of the Confetti reporter. The R26R-Confetti was present at 1 copy per diploid genome, suggesting that double-positive cells hepatocyte-derived progenitor cells were polyploidy. Microscopy confirmed cells were not doublets.

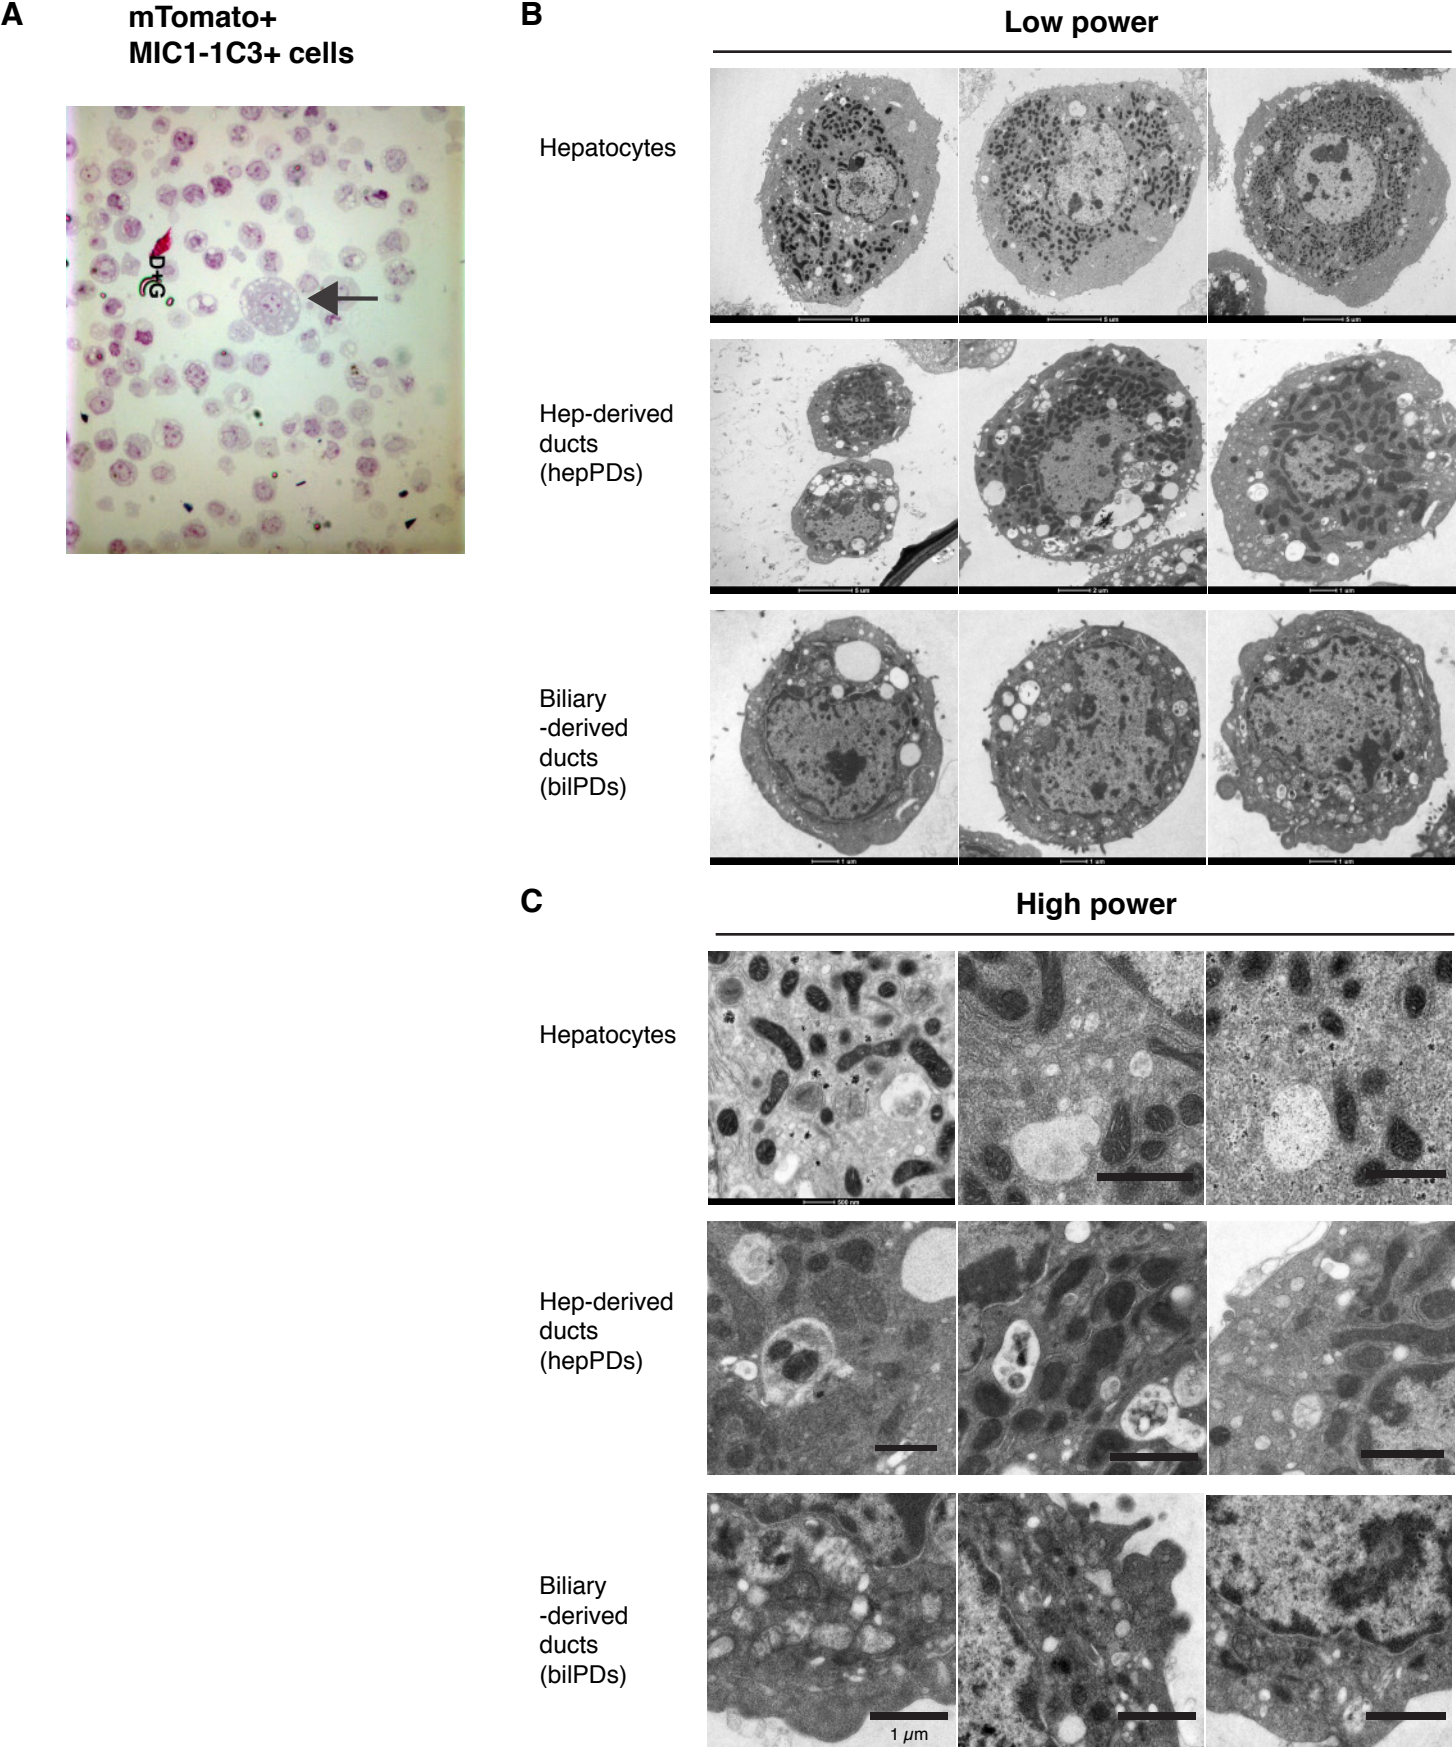

**Figure S3, related to Fig. 2: Additional microscopy images of sorted liver cells**  
A) Plastic section of hep-PDs with a single contaminating hepatocytes present (arrow) shown for size comparison.  
B) Low power TEM images of FACS sorted hepatocytes, hep-PDs, and bil-PDs and C) high power (bar length 1μm, or as indicated).



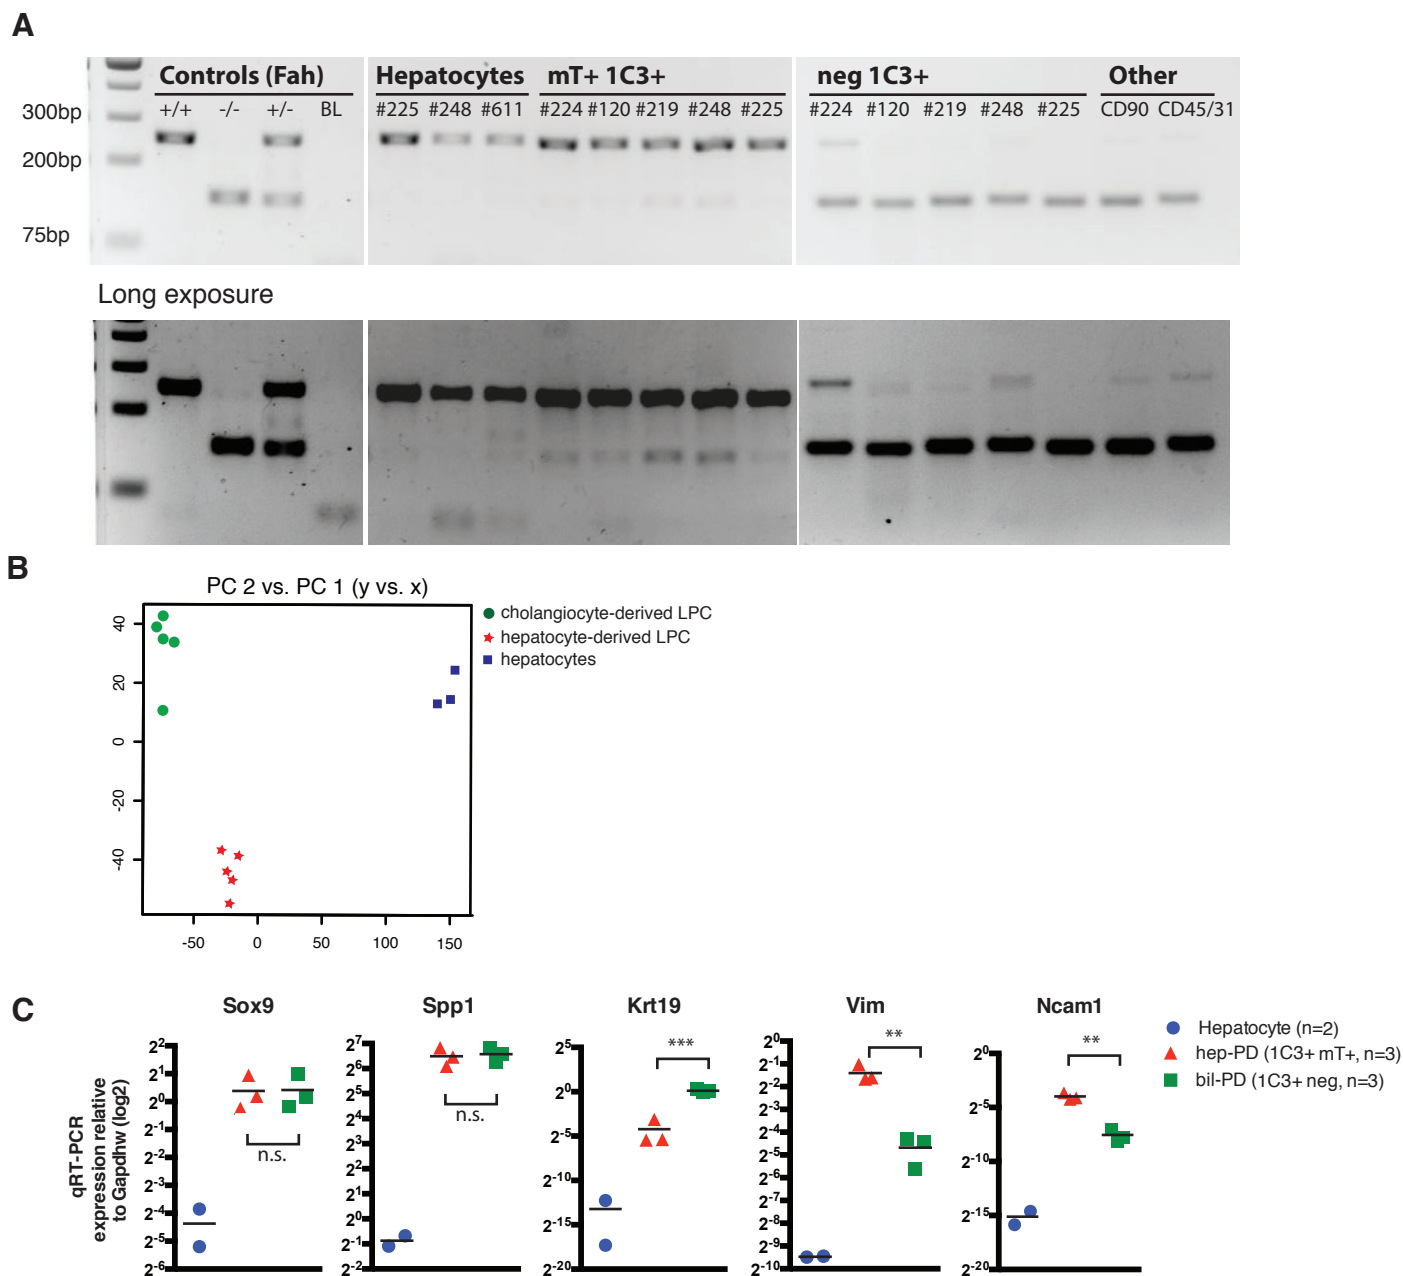

**Figure S4, related to Fig. 3: MIC1-1C3+ cells separated by mTomato phenotype are genetically and phenotypically distinct**

A) 3-primer DNA genotyping assay for *Fah* on FACS isolated MIC1-1C3+ cells confirms that mTomato was a reliable marker of cell origin. All samples were run on the same multi-row gel. Long exposure shows trace-level cross contamination in FACS samples but not PCR controls. B) Principle-component analysis of RNA-seq data separates three FACS sorted populations by gene expression. C) qRT-PCR expression levels of duct-associated transcripts normalized to *Gapdh* in FACS sorted 1C3+ cells or hepatocytes. mRNA levels were not significantly different in the two ductal populations for *Sox9* ( $p=0.94$ ) and *Spp1* ( $p=0.76$ ). *Krt19*, *Vim*, and *Ncam1* were differentially expressed in the two types of proliferative ducts (unpaired t-test,  $p < 0.01$  \*\*,  $p < 0.001$  \*\*\*).

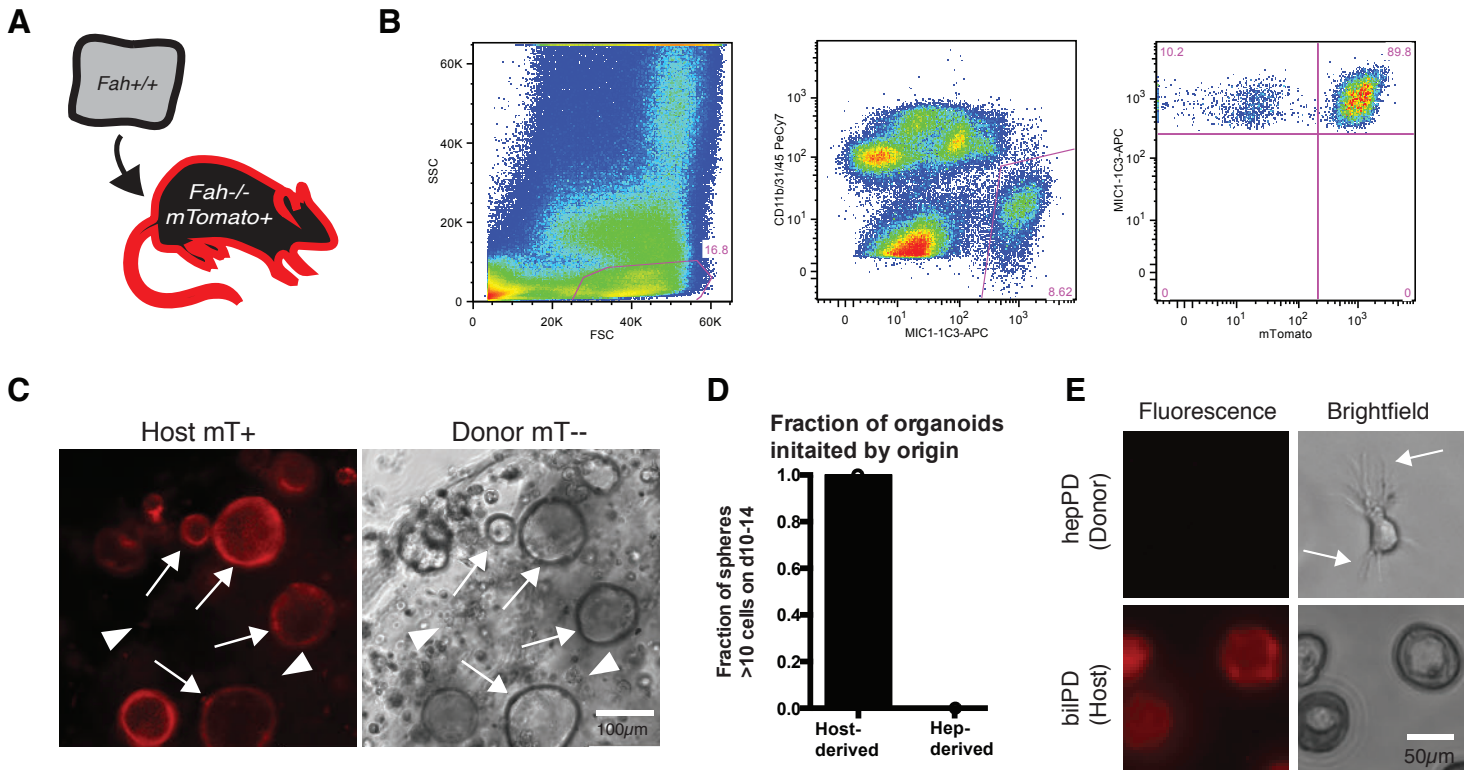

**Figure S5, related to Fig. 4. Color swap indicates *in vitro* differences are not an artifact of the mTomato fluorescent protein**

A) Wild-type hepatocytes were transplanted into ROSA-mTomato *Fah*<sup>-/-</sup> mice, allowed to repopulate for 10 weeks, and given DDC for 6 weeks. B) CD31<sup>-</sup> CD45<sup>-</sup> CD11b<sup>-</sup> MIC1-1C3<sup>+</sup> cells were analyzed for mTomato status following DDC injury. MIC1-1C3<sup>+</sup> mTomato<sup>-</sup> are hepPDs and 1C3<sup>+</sup> mTomato<sup>+</sup> are biIPDs. C) Unsorted non-parenchymal cells were seeded into matrigel for organoid formation assay. mTomato<sup>+</sup> cells formed organoids (arrowhead) but mTomato<sup>-</sup> cells (arrow) did not. D) All organoids were mTomato<sup>+</sup>, indicating a bile duct/host source. E) FACS sorted hepPDs (mTomato<sup>-</sup>) did not form organoids but extended filipoida, while host-derived biIPDs (mTomato<sup>+</sup>) initiated self-renewing organoid.

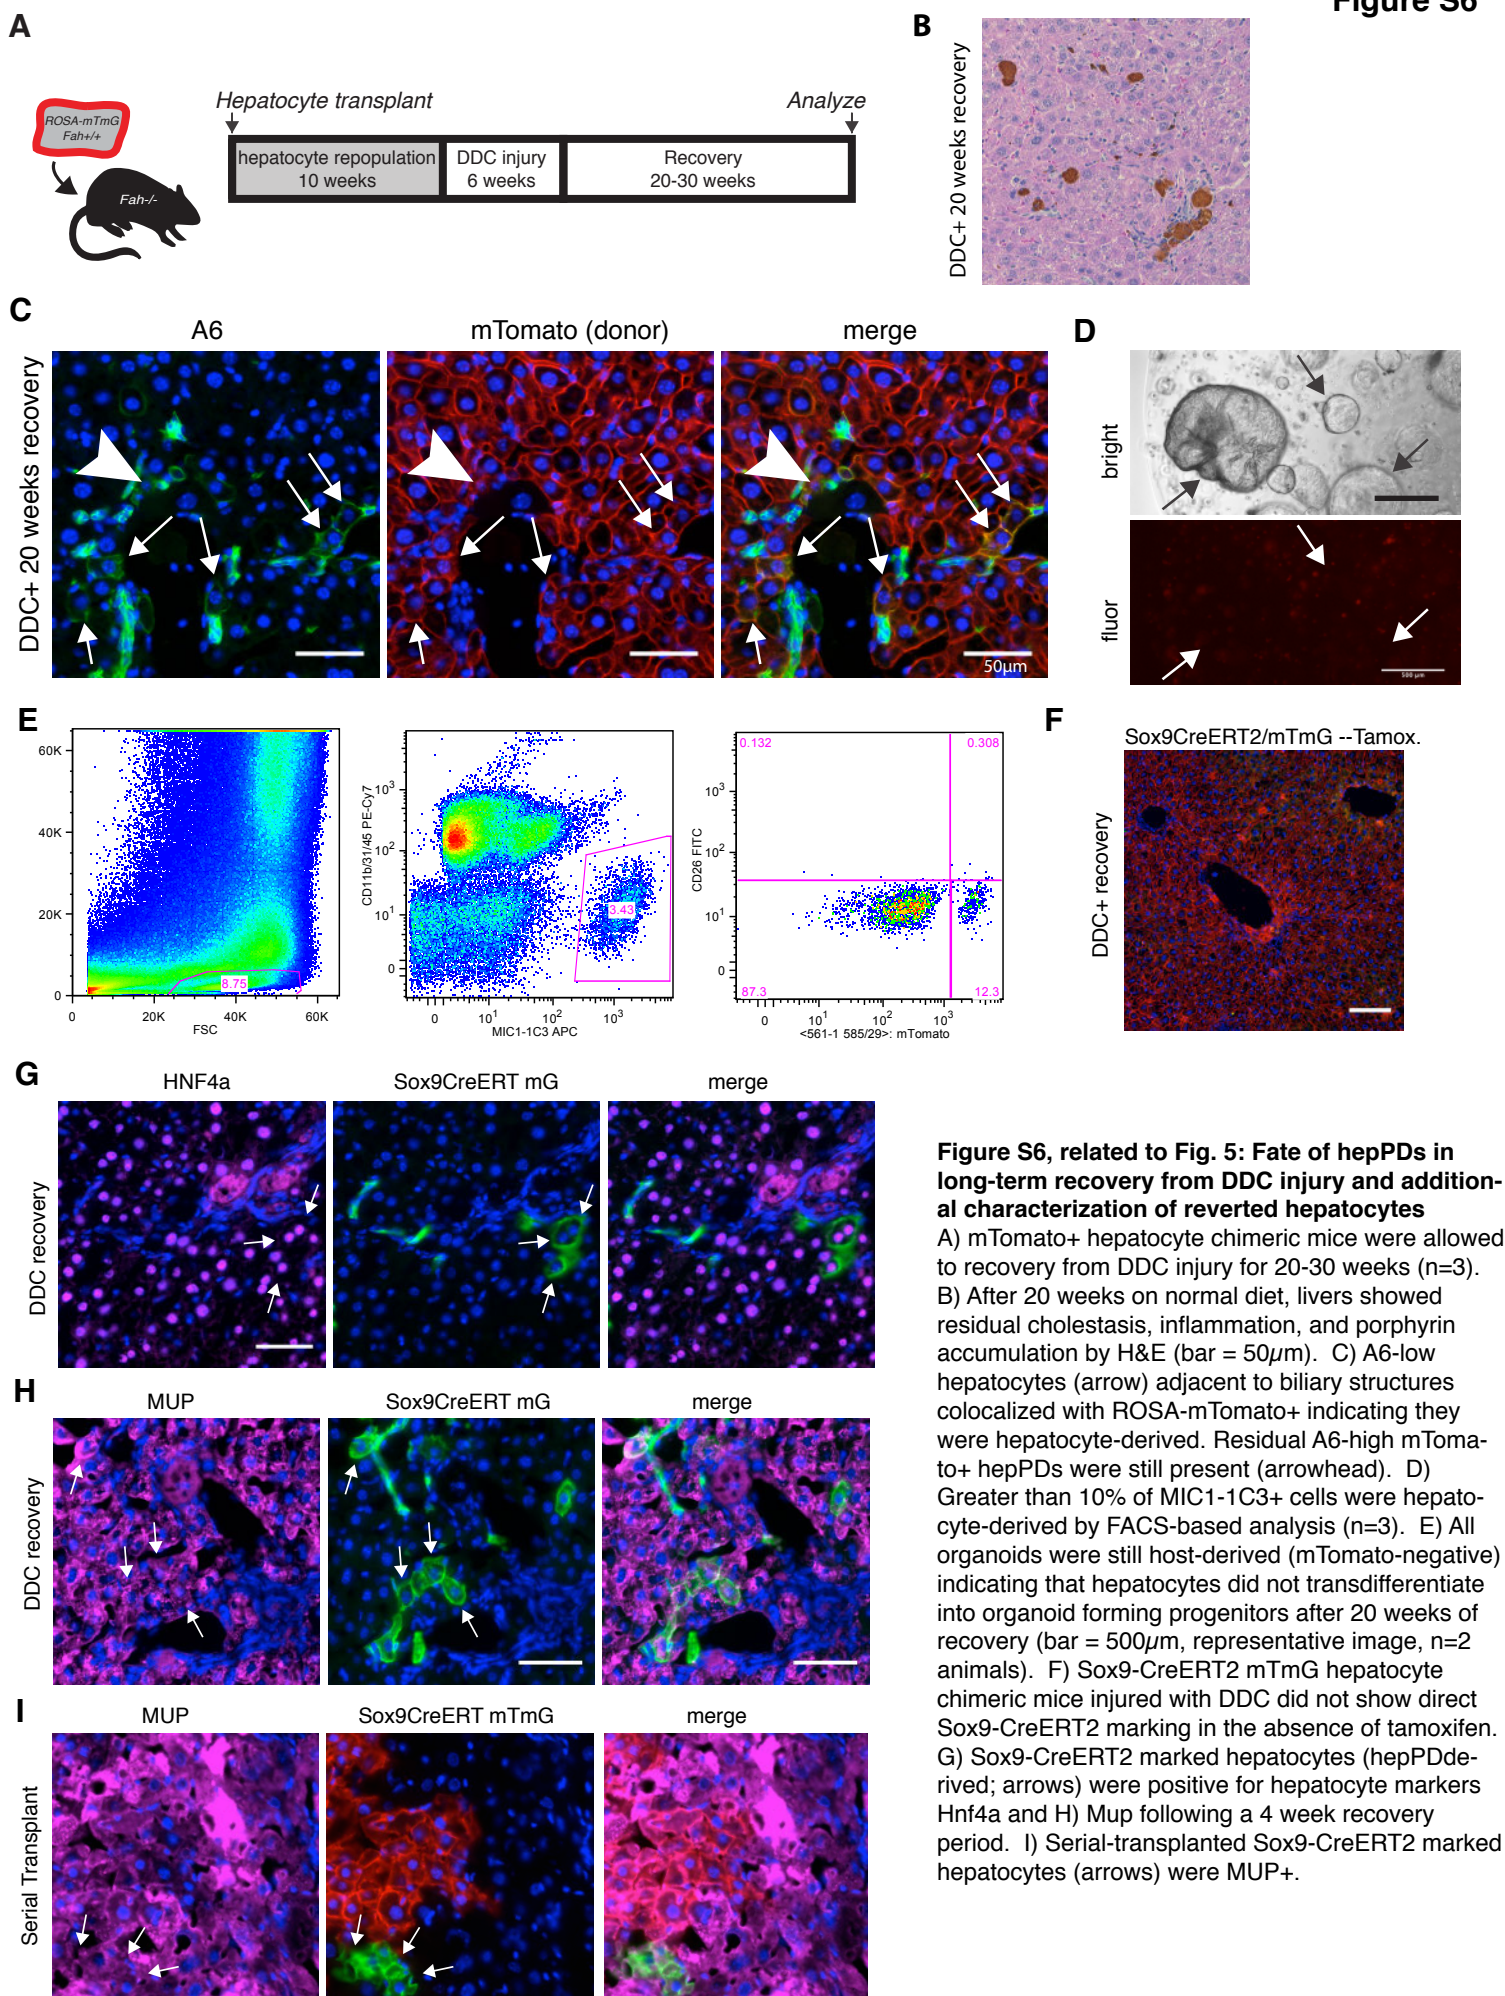



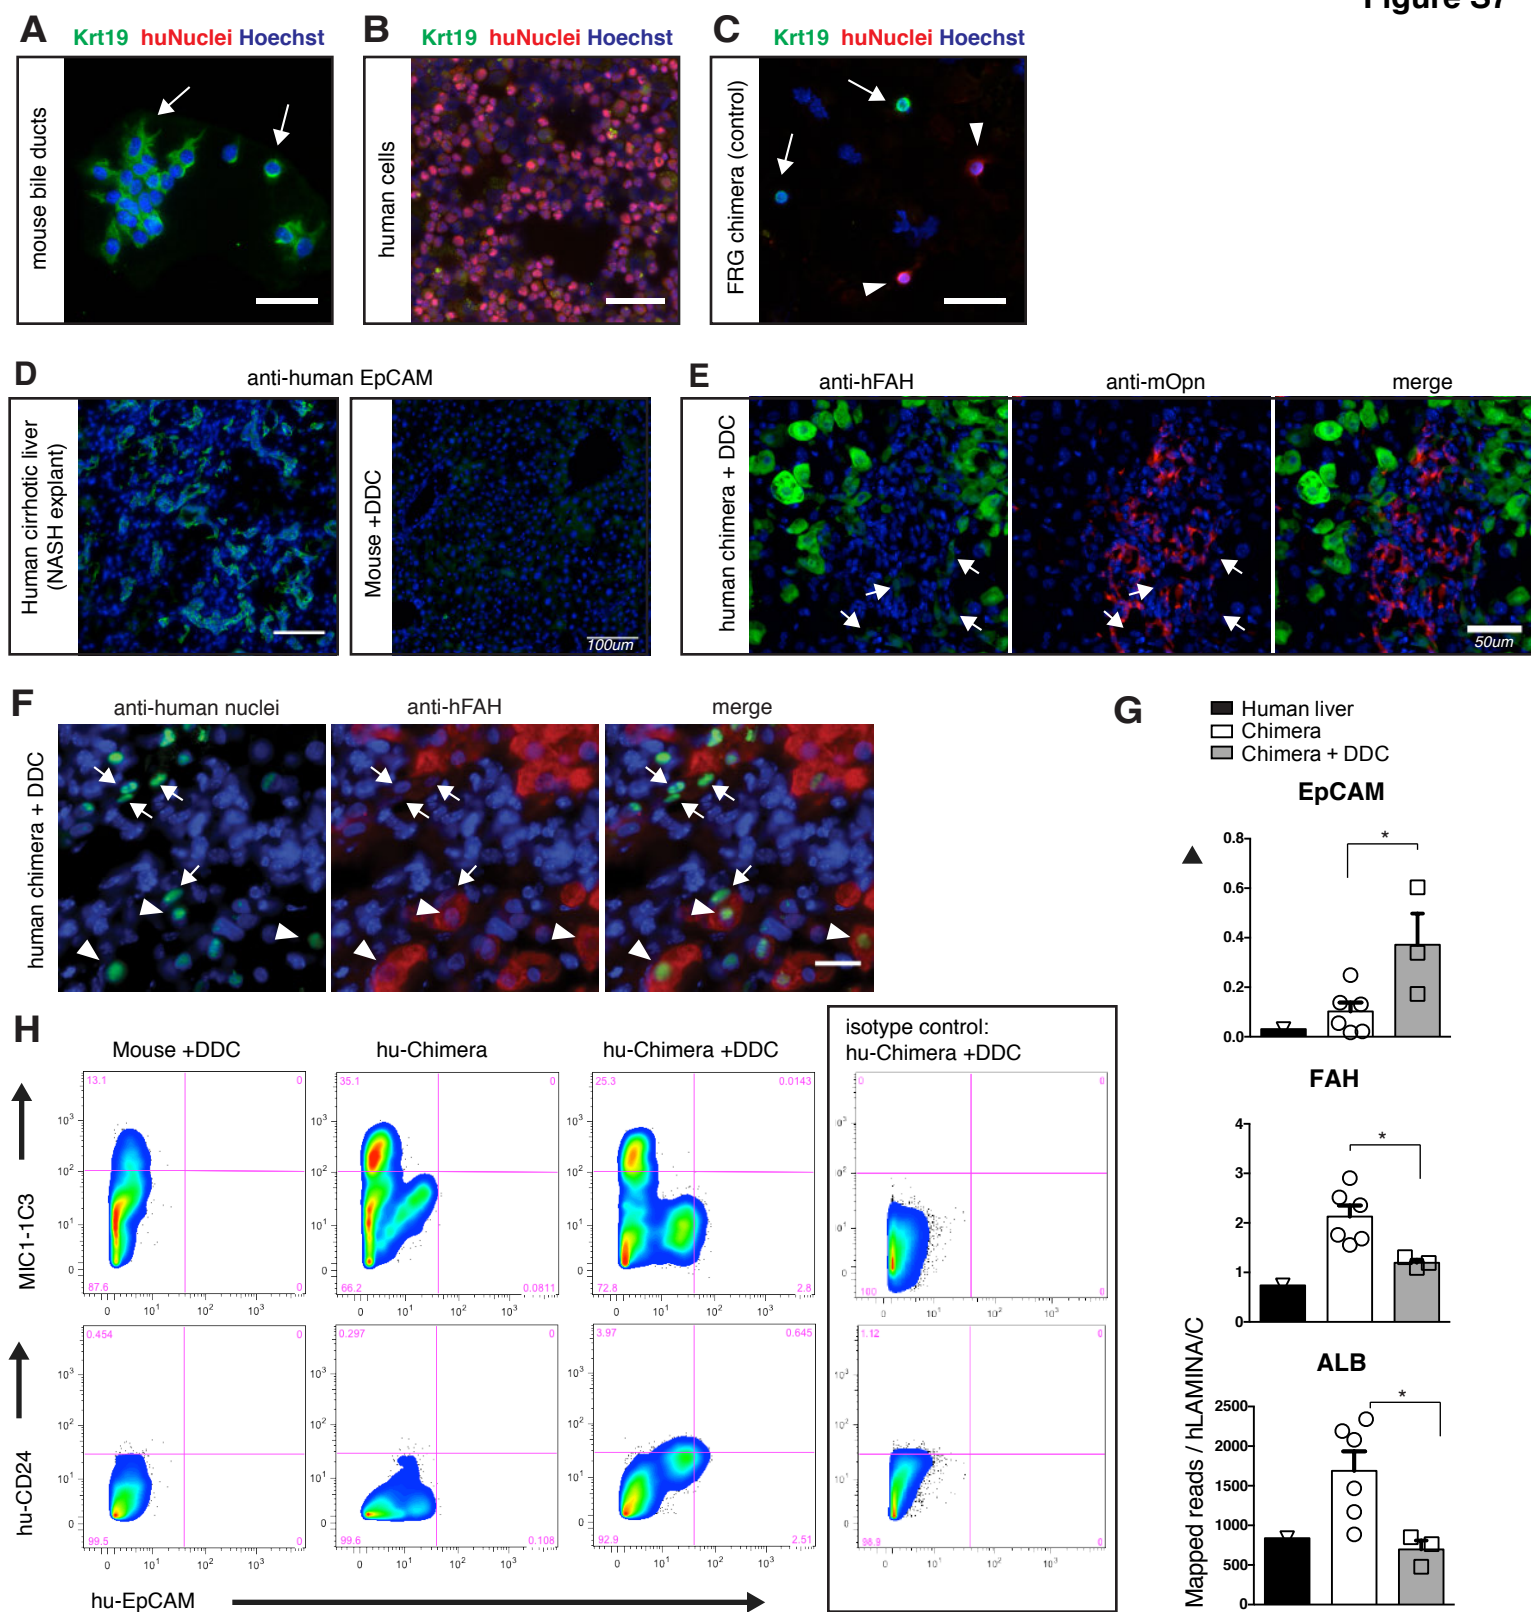

**Figure S7, related to Fig. 7: Identification of human hepatocyte-derived cells in chimeric livers with additional markers**

A) Krt19 (green) and human nuclear antigen staining in cultured mouse bile duct cells (cytospin) B) human blood and endothelium and C) dissociated cells from a humanized FRG mouse liver. Krt19+ cell (arrows) and human nuclear antigen+ cells (arrowhead) did not co-localize in a repopulated chimeric mice, suggesting that human Krt19+ cells were not present before injury (n=2 chimeric mice). D) Anti-human EpCAM identified ductal reactions in cirrhotic human liver (non-alcoholic steatohepatitis explant) but not DDC-injured mouse liver tissue. E) Human hepatocyte-derived ducts assume a ductal morphology (arrow), express low levels of FAH, and are in close contact with mouse-Opn+ cells. F) Human hepPDs (arrows, human nuclear antigen+), have ovoid nuclei and scant cytoplasm, and stain faintly for hepatocyte gene FAH. Hepatocytes (arrowhead) stain strongly for FAH, have round nuclei and abundant cytoplasm. G) Additional RNA-seq data from chimeric livers show DDC injury is associated with significantly greater human EpCAM and significantly less FAH and ALB mRNA compared with uninjured chimeras chimeric livers (t-test,  $p < 0.05$  \*). H) FACS analysis for mouse MIC1-1C3, human CD24, and human EpCAM in DDC treated mice, uninjured humanized FRG mice and DDC injured FRG mice (isotype control provided for comparison, far right).

| Gene symbol                     | Hepatocytes(n=3) |         | hepPDs (n=5) |         | bilPDs (n=5) |        | Fold diff:  |               |
|---------------------------------|------------------|---------|--------------|---------|--------------|--------|-------------|---------------|
|                                 | (RPKM)           | s.d.    | (RPKM)       | s.d.    | (RPKM)       | s.d.   | hepPD / Hep | hepPD / bilPD |
| <b>Hepatocyte</b>               |                  |         |              |         |              |        |             |               |
| <i>Alb</i>                      | 37559.47         | 9091.36 | 4653.57      | 1406.89 | 2872.78      | 489.03 | 0.12        | 1.62          |
| <i>Hgd</i>                      | 314.05           | 26.73   | 11.76        | 4.89    | 10.71        | 5.80   | 0.04        | 1.10          |
| <i>Cyp7a1</i>                   | 40.12            | 19.99   | 0.84         | 0.65    | 1.34         | 1.20   | 0.02        | 0.63          |
| <i>Ttr</i>                      | 3108.40          | 351.13  | 705.55       | 149.94  | 463.34       | 38.86  | 0.23        | 1.52          |
| <i>F9</i>                       | 135.63           | 11.16   | 43.14        | 4.85    | 6.54         | 3.31   | 0.32        | 2.52          |
| <i>Fah</i>                      | 292.62           | 57.61   | 58.87        | 7.36    | 14.014*      | 4.37   | 0.20        | N/A           |
| <i>Tdo2</i>                     | 510.59           | 132.18  | 47.25        | 25.76   | 29.44        | 17.16  | 0.09        | 1.61          |
| <i>Hnf4a</i>                    | 243.50           | 5.19    | 130.29       | 30.12   | 58.34        | 10.81  | 0.54        | 2.23          |
| <b>Progenitor/cholangiocyte</b> |                  |         |              |         |              |        |             |               |
| <i>Sox9</i>                     | 8.84             | 4.48    | 92.45        | 15.41   | 102.56       | 29.11  | 10.46       | 0.90          |
| <i>Spp1 (Opn)</i>               | 796.50           | 198.50  | 17559.80     | 1095.90 | 18618.33     | 587.62 | 22.05       | 0.94          |
| <i>Hnf1b</i>                    | 12.77            | 1.17    | 158.86       | 12.92   | 176.43       | 21.44  | 12.44       | 0.90          |
| <i>Krt19</i>                    | 0.36             | 0.29    | 42.54        | 23.45   | 657.89       | 65.25  | 119.27      | 0.06          |
| <i>Lgr5</i>                     | 1.34             | 0.52    | 0.24         | 0.10    | 0.07         | 0.05   | 0.18        | 3.70          |
| <i>Cd44</i>                     | 11.24            | 2.97    | 178.73       | 37.13   | 150.82       | 35.34  | 15.90       | 1.19          |
| <i>Cd24</i>                     | 2.02             | 0.84    | 481.16       | 61.65   | 676.05       | 85.61  | 238.59      | 0.71          |
| <i>Nes</i>                      | 0.04             | 0.03    | 8.54         | 2.06    | 2.94         | 0.47   | 213.60      | 2.91          |
| <i>Kit</i>                      | 0.14             | 0.06    | 7.22         | 2.06    | 2.94         | 0.51   | 52.83       | 2.46          |
| <i>Epcam</i>                    | 0.83             | 0.14    | 85.30        | 29.48   | 545.47       | 51.95  | 103.19      | 0.16          |
| <i>Itga3 (MIC1-1C3)</i>         | 6.79             | 0.71    | 157.60       | 15.29   | 154.36       | 6.57   | 23.20       | 1.02          |
| <i>Cftr</i>                     | 0.02             | 0.03    | 11.50        | 3.61    | 49.78        | 5.23   | 492.86      | 0.23          |
| <i>Tacstd2 (Trop2)</i>          | 0.02             | 0.02    | 1.16         | 0.57    | 38.75        | 11.30  | 57.90       | 0.03          |
| <i>Tnfrsf12a (Fn14)</i>         | 116.01           | 13.28   | 314.77       | 63.33   | 278.23       | 45.34  | 2.71        | 1.13          |
| <i>Prom1 (Cd133)</i>            | 10.96            | 15.11   | 26.59        | 9.19    | 139.14       | 17.75  | 2.43        | 0.19          |
| <i>Jag1</i>                     | 1.51             | 0.65    | 75.73        | 9.86    | 77.66        | 23.22  | 50.15       | 0.98          |
| <i>Notch2</i>                   | 14.43            | 1.46    | 56.36        | 8.42    | 51.75        | 4.03   | 3.90        | 1.09          |
| <b>EMT-related</b>              |                  |         |              |         |              |        |             |               |
| <i>Zeb1</i>                     | 5.04             | 0.26    | 12.55        | 0.85    | 3.44         | 0.90   | 2.49        | 3.65          |
| <i>Vim</i>                      | 9.12             | 4.74    | 211.34       | 33.53   | 45.79        | 25.42  | 23.16       | 4.62          |
| <i>Cdh2</i>                     | 29.47            | 2.37    | 60.19        | 4.68    | 13.19        | 5.24   | 2.04        | 4.56          |
| <i>Ncam1</i>                    | 0.01             | 0.01    | 7.03         | 2.82    | 1.36         | 0.70   | 1054.80     | 5.16          |
| <i>Smo</i>                      | 1.38             | 0.46    | 36.47        | 2.16    | 35.23        | 2.65   | 26.42       | 1.04          |
| <i>Snai1</i>                    | 0.09             | 0.10    | 0.09         | 0.04    | 0.88         | 0.52   | 1.02        | 0.10          |
| <i>Snai2</i>                    | 3.86             | 1.37    | 1.52         | 0.33    | 0.50         | 0.23   | 0.39        | 3.02          |
| <i>Twist1</i>                   | 0.01             | 0.01    | 0.19         | 0.07    | 0.17         | 0.12   | 27.90       | 1.12          |
| <i>Cdh1</i>                     | 100.13           | 9.08    | 377.64       | 36.59   | 553.60       | 39.05  | 3.77        | 0.68          |
| <b>Other cell types</b>         |                  |         |              |         |              |        |             |               |
| <i>Ptprc (Cd45)</i>             | 0.22             | 0.18    | 1.46         | 0.98    | 2.89         | 1.97   | 6.62        | 0.50          |
| <i>Pecam1 (Cd31)</i>            | 0.44             | 0.32    | 1.64         | 1.06    | 3.96         | 2.56   | 3.76        | 0.42          |
| <i>Gfap</i>                     | 0.00             | 0.01    | 0.08         | 0.04    | 0.30         | 0.07   | 22.80       | 0.25          |
| <i>Thy1</i>                     | 0.02             | 0.00    | 0.40         | 0.49    | 0.77         | 0.67   | 20.10       | 0.52          |
| <i>Col1a1</i>                   | 0.20             | 0.17    | 3.68         | 1.47    | 35.64        | 39.97  | 18.41       | 0.10          |
| <i>Desmin</i>                   | 0.05             | 0.02    | 0.30         | 0.13    | 1.55         | 1.11   | 5.92        | 0.19          |
| <i>Yap1</i>                     | 30.93            | 0.06    | 52.73        | 2.76    | 42.73        | 3.30   | 1.70        | 1.23          |
| <i>Ctgf</i>                     | 0.85             | 0.15    | 205.68       | 52.08   | 494.72       | 83.77  | 241.98      | 0.42          |
| <i>Cyr61</i>                    | 71.07            | 11.90   | 1037.55      | 326.93  | 1056.27      | 401.06 | 14.60       | 0.98          |
| <i>AmotL2</i>                   | 6.40             | 2.39    | 57.40        | 8.31    | 92.56        | 17.35  | 8.96        | 0.62          |
| <i>Rbfox3 (NeuN)</i>            | 0.00             | 0.01    | 0.02         | 0.01    | 0.09         | 0.08   | 4.80        | 2.52          |
| <i>Afp</i>                      | 2.96             | 0.67    | 3.48         | 0.68    | 2.62         | 1.85   | 1.18        | 2.52          |

\*Denotes gene deletion at exon5

**Table S1: Gene expression of selected genes between cell types in DDC injury**

RNAseq expression data (RPKM) for FACS sorted hepatocytes, hepPDs, and bilPDs for selected genes of interest. Mean and standard deviations values are shown below (relates to Figure 3).



**Table S2: Genesets enriched in hepPDs versus Hepatocytes**

| <b>Geneset DETAILS</b>                                  | <b>SIZE</b> | <b>NES</b> | <b>NOM p-val</b> | <b>FDR q-val</b> |
|---------------------------------------------------------|-------------|------------|------------------|------------------|
| KEGG_NOTCH_SIGNALING_PATHWAY                            | 42          | 1.6        | 0.001            | 0.073            |
| KEGG_BASAL_CELL_CARCINOMA                               | 54          | 1.61       | 0.001            | 0.114            |
| KEGG_MELANOGENESIS                                      | 93          | 1.48       | 0.001            | 0.144            |
| KEGG_HYPERTROPHIC_CARDIOMYOPATHY_HCM                    | 83          | 1.42       | 0.004            | 0.151            |
| KEGG_ARRHYTHMOGENIC_RV_CARDIOMYOPATHY                   | 74          | 1.49       | 0                | 0.151            |
| KEGG_FOCAL_ADHESION                                     | 184         | 1.38       | 0.001            | 0.161            |
| KEGG_PATHWAYS_IN_CANCER                                 | 304         | 1.39       | 0                | 0.162            |
| KEGG_EPITHELIAL_CELL_SIGNALING_IN_H_PYLORI              | 63          | 1.42       | 0.005            | 0.162            |
| KEGG_ECM_RECEPTOR_INTERACTION                           | 80          | 1.4        | 0.009            | 0.169            |
| KEGG_PHOSPHATIDYLINOSITOL_SIGNALING_SYSTEM              | 64          | 1.39       | 0.013            | 0.171            |
| KEGG_DILATED_CARDIOMYOPATHY                             | 89          | 1.42       | 0.008            | 0.172            |
| KEGG_AXON_GUIDANCE                                      | 125         | 1.5        | 0                | 0.173            |
| KEGG_SPLICEOSOME                                        | 94          | 1.39       | 0.002            | 0.174            |
| KEGG_NEUROTROPHIN_SIGNALING_PATHWAY                     | 116         | 1.42       | 0                | 0.178            |
| KEGG_HEDGEHOG_SIGNALING_PATHWAY                         | 54          | 1.51       | 0.004            | 0.187            |
| KEGG_WNT_SIGNALING_PATHWAY                              | 140         | 1.43       | 0.001            | 0.188            |
| KEGG_COLORECTAL_CANCER                                  | 60          | 1.36       | 0.027            | 0.191            |
| KEGG_TIGHT_JUNCTION                                     | 119         | 1.45       | 0.002            | 0.191            |
| KEGG_MAPK_SIGNALING_PATHWAY                             | 249         | 1.43       | 0                | 0.193            |
| KEGG_LEISHMANIA_INFECTION                               | 47          | 1.35       | 0.037            | 0.203            |
| KEGG_RENAL_CELL_CARCINOMA                               | 67          | 1.34       | 0.026            | 0.207            |
| KEGG_OLFACTORY_TRANSDUCTION                             | 28          | 1.34       | 0.069            | 0.211            |
| KEGG_ENDOCYTOSIS                                        | 150         | 1.33       | 0.005            | 0.219            |
| KEGG_T_CELL_RECEPTOR_SIGNALING_PATHWAY                  | 104         | 1.32       | 0.01             | 0.22             |
| KEGG_REGULATION_OF_ACTIN_CYTOSKELETON                   | 192         | 1.33       | 0.001            | 0.223            |
| KEGG_ERBB_SIGNALING_PATHWAY                             | 83          | 1.3        | 0.034            | 0.224            |
| KEGG_FC_GAMMA_R_MEDIATED_PHAGOCYTOSIS                   | 84          | 1.3        | 0.038            | 0.226            |
| KEGG_CELL_CYCLE                                         | 113         | 1.31       | 0.007            | 0.227            |
| KEGG_CHRONIC_MYELOID_LEUKEMIA                           | 70          | 1.3        | 0.043            | 0.233            |
| KEGG_ENDOMETRIAL_CANCER                                 | 49          | 1.29       | 0.077            | 0.233            |
| KEGG_TGF_BETA_SIGNALING_PATHWAY                         | 84          | 1.29       | 0.037            | 0.234            |
| KEGG_VEGF_SIGNALING_PATHWAY                             | 69          | 1.31       | 0.043            | 0.235            |
| KEGG_ADHERENS_JUNCTION                                  | 72          | 1.27       | 0.034            | 0.236            |
| KEGG_SMALL_CELL_LUNG_CANCER                             | 80          | 1.29       | 0.048            | 0.236            |
| KEGG_GLYCOSAMINOGLYCAN_BIOSYNTHESIS_CHONDROITIN_SULFATE | 15          | 1.31       | 0.111            | 0.236            |
| KEGG_VASOPRESSIN_REGULATED_WATER_REABSORPTION           | 42          | 1.28       | 0.09             | 0.238            |
| KEGG_DNA_REPLICATION                                    | 33          | 1.28       | 0.107            | 0.242            |
| KEGG_GNRH_SIGNALING_PATHWAY                             | 94          | 1.28       | 0.042            | 0.245            |

Table S2: Genesets enriched in hepPDs versus Hepatocytes. Differentially expressed genesets identified with GSEA geneset analysis (KEGG) (relates to Figure 3).

**Table S3: Genesets enriched in hepPDs versus bilPDs**

| <b>Geneset DETAILS</b>                            | <b>SIZE</b> | <b>NES</b> | <b>NOM p-val</b> | <b>FDR q-val</b> |
|---------------------------------------------------|-------------|------------|------------------|------------------|
| KEGG_TYROSINE_METABOLISM                          | 36          | 2.35       | 0                | 0                |
| KEGG_FATTY_ACID_METABOLISM                        | 33          | 2.25       | 0                | 0.001            |
| KEGG_BETA_ALANINE_METABOLISM                      | 22          | 2.18       | 0                | 0.001            |
| KEGG_TRYPTOPHAN_METABOLISM                        | 37          | 2.15       | 0                | 0                |
| KEGG_COMPLEMENT_AND_COAGULATION_CASCADES          | 48          | 2.13       | 0                | 0                |
| KEGG_BUTANOATE_METABOLISM                         | 30          | 2.11       | 0                | 0                |
| KEGG_DRUG_METABOLISM_CYTOCHROME_P450              | 42          | 2.05       | 0                | 0.001            |
| KEGG_VALINE_LEUCINE_AND_ISOLEUCINE_DEGRADATION    | 41          | 2.03       | 0                | 0.001            |
| KEGG_PHENYLALANINE_METABOLISM                     | 18          | 2          | 0                | 0.001            |
| KEGG_CYSTEINE_AND_METHIONINE_METABOLISM           | 30          | 1.99       | 0                | 0.001            |
| KEGG_BIOSYNTHESIS_OF_UNSATURATED_FATTY_ACIDS      | 18          | 1.93       | 0                | 0.002            |
| KEGG_ASCORBATE_AND_ALDARATE_METABOLISM            | 13          | 1.92       | 0.003            | 0.002            |
| KEGG_HISTIDINE_METABOLISM                         | 27          | 1.92       | 0.004            | 0.002            |
| KEGG_PEROXISOME                                   | 71          | 1.91       | 0                | 0.002            |
| KEGG_PENTOSE_AND_GLUCURONATE_INTERCONVERSIONS     | 14          | 1.87       | 0                | 0.003            |
| KEGG_DRUG_METABOLISM_OTHER_ENZYMES                | 27          | 1.85       | 0                | 0.005            |
| KEGG_LIMONENE_AND_PINENE_DEGRADATION              | 10          | 1.81       | 0.003            | 0.007            |
| KEGG_GLYCINE_SERINE_AND_THREONINE_METABOLISM      | 31          | 1.73       | 0.004            | 0.013            |
| KEGG_FOLATE_BIOSYNTHESIS                          | 10          | 1.71       | 0.011            | 0.014            |
| KEGG_AMINOACYL_TRNA_BIOSYNTHESIS                  | 32          | 1.7        | 0                | 0.016            |
| KEGG_PROANOATE_METABOLISM                         | 30          | 1.67       | 0.004            | 0.021            |
| KEGG_CITRATE_CYCLE_TCA_CYCLE                      | 28          | 1.63       | 0                | 0.028            |
| KEGG_PRIMARY_BILE_ACID_BIOSYNTHESIS               | 15          | 1.6        | 0.023            | 0.036            |
| KEGG_ALANINE_ASPARTATE_AND_GLUTAMATE_METABOLISM   | 31          | 1.58       | 0.008            | 0.04             |
| KEGG_ARGININE_AND_PROLINE_METABOLISM              | 50          | 1.55       | 0.005            | 0.048            |
| KEGG_RETINOL_METABOLISM                           | 31          | 1.54       | 0.021            | 0.049            |
| KEGG_MATURITY_ONSET_DIABETES_OF_THE_YOUNG         | 19          | 1.54       | 0.038            | 0.048            |
| KEGG_PORPHYRIN_AND_CHLOROPHYLL_METABOLISM         | 29          | 1.54       | 0.025            | 0.048            |
| KEGG_NICOTINATE_AND_NICOTINAMIDE_METABOLISM       | 21          | 1.53       | 0.031            | 0.049            |
| KEGG_PANTOTHENATE_AND_COA_BIOSYNTHESIS            | 15          | 1.52       | 0.038            | 0.051            |
| KEGG_METABOLISM_OF_XENOBIOTICS_BY_CYTOCHROME_P450 | 39          | 1.48       | 0.028            | 0.067            |
| KEGG_GLUTATHIONE_METABOLISM                       | 45          | 1.47       | 0.052            | 0.069            |
| KEGG_LYSINE_DEGRADATION                           | 43          | 1.44       | 0.038            | 0.08             |
| KEGG_ABC_TRANSPORTERS                             | 40          | 1.43       | 0.049            | 0.083            |
| KEGG_RIBOFLAVIN_METABOLISM                        | 16          | 1.39       | 0.103            | 0.104            |
| KEGG_PROTEASOME                                   | 43          | 1.38       | 0.045            | 0.105            |
| KEGG_SELENOAMINO_ACID_METABOLISM                  | 21          | 1.35       | 0.108            | 0.121            |
| KEGG_PPAR_SIGNALING_PATHWAY                       | 61          | 1.33       | 0.048            | 0.135            |
| KEGG_GLYCOLYSIS_GLUconeogenesis                   | 54          | 1.26       | 0.087            | 0.194            |
| KEGG_LYSOSOME                                     | 114         | 1.23       | 0.054            | 0.219            |
| KEGG_PENTOSE_PHOSPHATE_PATHWAY                    | 24          | 1.21       | 0.154            | 0.237            |
| KEGG_STEROID_HORMONE_BIOSYNTHESIS                 | 31          | 1.21       | 0.151            | 0.237            |
| KEGG_REGULATION_OF_AUTOPHAGY                      | 28          | 1.19       | 0.162            | 0.246            |

Table S3: Genesets enriched in hepPDs versus bilPDs. Differentially expressed genesets identified with GSEA geneset analysis (KEGG) (relates to Figure 3).

| Gene                | 30141_Chimera | 30154_Chimera | 1794_Chimera_DDC | 30012_Chimera | 225_Mouse_Heps | 225_Mouse_MIC11c3 | Normal Human Liver | F19b1_Chimera | F19b2_Chimera | F19b3_Chimera | Human Cholangiocytes | 1431_Chimera_DDC | 3567_Chimera_DDC | Refseq ID      | % identity (species-species) | % gaps |
|---------------------|---------------|---------------|------------------|---------------|----------------|-------------------|--------------------|---------------|---------------|---------------|----------------------|------------------|------------------|----------------|------------------------------|--------|
| ACTB                | 847           | 900           | 7471             | 9280          | 27             | 151               | 6803               | 2667          | 1502          | 3817          | 74351                | 981              | 1692             | NM_0011101.3   | 90                           | 1      |
| ALB                 | 484250        | 655243        | 691371           | 1325310       | 0              | 0                 | 640934             | 760431        | 259616        | 433514        | 283474               | 162014           | 349546           | NM_000477.5    | 77                           | 1      |
| CD24A               | 46            | 56            | 2280             | 200           | 0              | 0                 | 244                | 47            | 11            | 16            | 17697                | 435              | 231              | NM_001792.3    | 78                           | 8      |
| CD44                | 0             | 1             | 430              | 35            | 0              | 0                 | 91                 | 0             | 0             | 3             | 192                  | 51               | 16               | NM_013230.2    | 79                           | 3      |
| CDH2                | 145           | 257           | 887              | 1066          | 0              | 1                 | 350                | 475           | 82            | 213           | 2970                 | 151              | 216              | NM_000610.3    | 88                           | 1      |
| FAH                 | 642           | 792           | 1721             | 1994          | 0              | 0                 | 564                | 767           | 275           | 822           | 242                  | 231              | 537              | NM_001454.3    | 85                           | 0      |
| FOXJ1               | 0             | 0             | 3                | 0             | 0              | 0                 | 0                  | 0             | 0             | 0             | 141                  | 0                | 0                | NM_007197.3    | 87                           | 1      |
| FZD10               | 0             | 0             | 0                | 0             | 0              | 0                 | 0                  | 0             | 0             | 0             | 0                    | 0                | 0                | NM_000137.2    | 86                           | 1      |
| GAPDH               | 1794          | 2397          | 9850             | 7841          | 1              | 1                 | 3581               | 5210          | 3109          | 7165          | 9557                 | 1451             | 2255             | NM_000181.3    | 89                           | 0      |
| GUSB                | 176           | 248           | 1620             | 828           | 0              | 0                 | 534                | 272           | 97            | 314           | 1158                 | 115              | 411              | NM_001289745.1 | 79                           | 1      |
| HNF1B               | 15            | 26            | 247              | 77            | 4              | 67                | 88                 | 31            | 10            | 45            | 3355                 | 38               | 44               | NM_000458.2    | 86                           | 2      |
| JAG1                | 5             | 12            | 162              | 12            | 1              | 17                | 76                 | 28            | 17            | 45            | 5597                 | 31               | 26               | NM_000214.2    | 89                           | 1      |
| KRT19               | 0             | 1             | 0                | 0             | 0              | 0                 | 129                | 0             | 1             | 0             | 5702                 | 4                | 0                | NM_002276.4    | 84                           | 1      |
| KRT7                | 7             | 16            | 2826             | 88            | 0              | 0                 | 99                 | 1             | 4             | 3             | 16575                | 314              | 253              | NM_005556.3    | 85                           | 1      |
| LMNA                | 221           | 315           | 1444             | 1133          | 0              | 0                 | 764                | 325           | 177           | 489           | 18240                | 212              | 411              | NM_170707.3    | 84                           | 1      |
| SMO                 | 233           | 273           | 282              | 913           | 0              | 0                 | 164                | 158           | 52            | 151           | 323                  | 40               | 94               | NM_000582.2    | 88                           | 1      |
| SOX9                | 36            | 39            | 538              | 146           | 0              | 0                 | 71                 | 49            | 23            | 59            | 8267                 | 65               | 110              | NM_005631.4    | 89                           | 2      |
| SPP1                | 26            | 57            | 4413             | 66            | 0              | 0                 | 116                | 0             | 0             | 2             | 6501                 | 322              | 616              | NM_000346.3    | 80                           | 1      |
| TTR                 | 9348          | 13098         | 12529            | 32752         | 0              | 0                 | 21720              | 7799          | 2576          | 6200          | 898                  | 1509             | 5176             | NM_000371.3    | 81                           | 0      |
| VIM                 | 1             | 4             | 262              | 10            | 0              | 0                 | 752                | 0             | 4             | 0             | 11407                | 36               | 6                | NM_003380.3    | 90                           | 1      |
| ZEB1                | 70            | 51            | 129              | 182           | 19             | 28                | 90                 | 108           | 46            | 37            | 18                   | 52               | 35               | NM_001128128.2 | 86                           | 1      |
| EpCAM               | 4             | 7             | 489              | 62            | 0              | 0                 | 24                 | 45            | 44            | 64            | 4317                 | 128              | 71               | NM_002354.2    | 80                           | 1      |
| mActb               | 222153        | 208173        | 193101           | 178538        | 107822         | 26466             | 0                  | 182431        | 180821        | 211433        | 0                    | 351304           | 178593           | NM_007393.3    |                              |        |
| mAlb                | 2079696       | 2490783       | 3465719          | 2514398       | 1969623        | 280099            | 0                  | 2376240       | 1759517       | 1758750       | 0                    | 4236799          | 2065659          | NM_009654.3    |                              |        |
| mCd24A              | 1725          | 1775          | 1229             | 1530          | 12501          | 3225              | 0                  | 490           | 784           | 966           | 0                    | 1842             | 1197             | NM_007664.4    |                              |        |
| mCd44               | 554           | 960           | 977              | 711           | 600            | 10937             | 0                  | 869           | 700           | 884           | 0                    | 975              | 696              | NM_009846.2    |                              |        |
| mCdh2               | 657           | 1080          | 805              | 840           | 945            | 13385             | 0                  | 623           | 681           | 840           | 0                    | 1131             | 712              | NM_009851.2    |                              |        |
| mFah                | 3828          | 37385         | 31513            | 9864          | 32438          | 637838            | 0                  | 2063          | 2403          | 2266          | 0                    | 98928            | 22385            | NM_008240.3    |                              |        |
| mFoxj1              | 62            | 95            | 529              | 276           | 3              | 1115              | 0                  | 133           | 304           | 375           | 0                    | 1454             | 767              | NM_175284.3    |                              |        |
| mFzd10              | 41            | 166           | 592              | 245           | 2              | 1102              | 11                 | 80            | 67            | 119           | 307                  | 794              | 470              | NM_010176.4    |                              |        |
| mGapdh              | 370           | 1229          | 503              | 329           | 172            | 10816             | 0                  | 769           | 362           | 412           | 2                    | 684              | 485              | NM_010368.1    |                              |        |
| mGusb               | 706           | 1233          | 1960             | 911           | 108            | 34171             | 0                  | 1297          | 4621          | 4319          | 0                    | 4774             | 1426             | NM_001289726.1 |                              |        |
| mHnf1B              | 182           | 482           | 682              | 297           | 172            | 5800              | 0                  | 479           | 422           | 756           | 0                    | 753              | 338              | NM_001291268.1 |                              |        |
| mJag1               | 32            | 334           | 310              | 90            | 18             | 4966              | 0                  | 16            | 19            | 30            | 0                    | 384              | 262              | NM_013822.5    |                              |        |
| mKrt19              | 1751          | 2025          | 3471             | 1679          | 2361           | 3460              | 0                  | 2437          | 2291          | 3071          | 0                    | 3311             | 1697             | NM_008471.2    |                              |        |
| mKrt7               | 2685          | 3004          | 4899             | 2843          | 5911           | 12193             | 0                  | 7306          | 6218          | 8930          | 0                    | 6034             | 3195             | NM_033073.3    |                              |        |
| mLmna               | 61817         | 59751         | 51286            | 47340         | 80796          | 44334             | 1                  | 49978         | 76233         | 88338         | 11                   | 69571            | 51227            | NM_001002011.3 |                              |        |
| mSmo                | 3101          | 3440          | 3211             | 2350          | 5879           | 14168             | 0                  | 4049          | 4325          | 5069          | 1                    | 4480             | 2625             | NM_001204201.1 |                              |        |
| mSox9               | 795           | 924           | 570              | 602           | 721            | 1901              | 1                  | 1157          | 1202          | 1299          | 0                    | 992              | 560              | NM_176996.4    |                              |        |
| mSpp1               | 1             | 0             | 4                | 0             | 17             | 329               | 0                  | 6             | 2             | 0             | 0                    | 3                | 3                | NM_011448.4    |                              |        |
| mTtr                | 1118          | 1448          | 5322             | 2720          | 469            | 11764             | 0                  | 991           | 792           | 1032          | 5                    | 7153             | 2479             | NM_013697.5    |                              |        |
| mVim                | 260           | 458           | 2790             | 883           | 2175           | 30612             | 0                  | 758           | 399           | 400           | 0                    | 3707             | 1388             | NM_011701.4    |                              |        |
| mZeb1               | 15081         | 12558         | 34180            | 16161         | 28419          | 64649             | 41                 | 71139         | 82192         | 107686        | 527                  | 47776            | 24449            | NM_011546.3    |                              |        |
| mEpCam              | 85            | 322           | 691              | 317           | 53             | 4660              | 0                  | 274           | 242           | 236           | 0                    | 1988             | 822              | NM_008532.2    |                              |        |
| TOTAL               | 2,894,477     | 3,501,089     | 4,542,118        | 4,164,540     | 2,251,204      | 1,213,595         | 677,224            | 3,481,679     | 2,391,957     | 2,649,870     | 467,518              | 5,010,901        | 2,722,288        |                |                              |        |
| Human               | 497,862       | 673,786       | 738,465          | 1,381,933     | 52             | 265               | 677,170            | 778,368       | 267,602       | 452,895       | 466,665              | 168,052          | 361,675          |                |                              |        |
| Mouse               | 2,396,615     | 2,827,303     | 3,803,653        | 2,782,607     | 2,251,152      | 1,213,330         | 54                 | 2,703,311     | 2,124,355     | 2,196,975     | 853                  | 4,842,849        | 2,360,613        |                |                              |        |
| % human tags        | 17.20%        | 19.25%        | 16.26%           | 33.18%        | 0.00%          | 0.02%             | 99.99%             | 22.36%        | 11.19%        | 17.09%        | 99.82%               | 3.35%            | 13.29%           |                |                              |        |
| Erroneous alignment |               |               |                  |               | 0.0023%        | 0.0218%           |                    |               |               |               | 0.1825%              |                  |                  |                |                              |        |

**Table S4: Total transcript-mapped reads in 22 selected genes from DDC treated humanized mice and controls.**  
Unique RNAseq transcripts from chimeric liver samples and controls (relates to Figure 7).



## Supplemental Experimental Procedures

### Detailed mouse strain information

The following mice used in this study are available from Jackson Labs.

| Short name                | Scientific name                                                       | Jax Stock # | Reference               |
|---------------------------|-----------------------------------------------------------------------|-------------|-------------------------|
| ROSA-mTmG                 | B6.129(Cg)-<br><i>Gt(ROSA)26Sortm4(ACTB-<br/>tdTomato,-EGFP)Luo/J</i> | 007676      | (Muzumdar et al., 2007) |
| R26R-Confetti             | B6.Cg-<br><i>Gt(ROSA)26Sortm1(CAG-<br/>Brainbow2.1)Cle/J</i>          | 017492      | (Snippert et al., 2010) |
| Sox9-CreERT2              | <i>Tg(Sox9-cre/ERT2)1Msan/J</i>                                       | 018829      | (Kopp et al., 2011)     |
| <i>Fah</i> <sup>-/-</sup> | <i>Fah tm1Mgo</i>                                                     | N/A         | (Grompe et al., 1993)   |

### Immunohistochemistry

| Antibody or antigen | IgG Type   | Dilution factor | Use      | Product    | Source                |
|---------------------|------------|-----------------|----------|------------|-----------------------|
| MIC1-1C3            | Rat mAB    | 100             | FACS     | NBP1-18961 | Novus Biologics       |
| OC2-2F8             | Rat mAB    | 20              | FACS     | Gift       | Craig Dorrell, OHSU   |
| Cd31                | Rat mAB    | 100             | FACS     | 561410     | BD Biosciences        |
| Cd45                | Rat mAB    | 100             | FACS, IF | 552848     | BD Biosciences        |
| Cd11b               | Rat mAB    | 100             | FACS, IF | 552850     | BD Biosciences        |
| Fah                 | Rabbit pAB | 500             | IF       | Custom     | Grompe Lab            |
| Osteopontin         | Goat pAB   | 100             | IF       | AF808      | R&D systems           |
| A6                  | Rat mAB    | 50              | IF       | Gift       | Valentina Factor, NCI |
| Krt19               | Rabbit pAB | 500             | IF       | Gift       | Xin Wang, U. Minn.    |
| Sox9                | Rabbit pAB | 500             | IF       | AB5535     | Millipore, Inc        |
| Hnf4a               | Rabbit pAB | 100             | IF       | sc-8987    | Santa Cruz Bio        |
| CD44                | Mouse mAB  | 100             | FACS     | 560533     | BD Biosciences        |
| EPCAM               | Mouse mAB  | 50              | FACS, IF | F0860      | Dako                  |

PFA-fixed tissues were cut into 8 $\mu$ m sections on a freezing microtome (Cryostat, Leica), washed 2 x 15' in PBS, permeabilized in 0.2-0.5% Triton-X 100 and blocked in 5% normal donkey serum for 2 hours to overnight. Primary antibodies were applied for 1 hour at room temperature or overnight at 4 degrees in a humidity chamber. Secondary antibodies (Donkey) and conjugated to AlexaFluor 488 or AlexaFluor 647 were used (Jackson Immunoresearch). Tissues were counterstained with Hoechst 33342 and mounted in Prolong Gold Antifade mounting media (Life Technologies). For EdU analysis, a 100mg/kg pulse was given by intraperitoneal injection 6 hours prior to sacrifice. The Click-iT labeling protocol was used according to the manufacturer instructions (Life Technologies) followed by co-immunohistochemistry. mTomato and mGFP fluorophores were directly observed without secondary antibody detection. Up to four-color images were captured on an Axio Imager M2 with color MRm and monochrome MRc 5 cameras (Carl Zeiss) running Xen Blue 2011. Large area images

were acquired with the Tiles module and stitched. This system is part of the Advanced Light Microscopy Core at the Jungers Center, OHSU Portland, Oregon.

### *Rnaseq data analysis*

The first 4 bases from each read were trimmed and the subsequent 44 bases were aligned to the *Mus musculus* genome (UCSC mm9) using Bowtie version 0.12.7. Tag alignment was implemented using custom R scripts (<http://www.R-project.org/>) according to UCSC Refseq gene models. Only reads that uniquely aligned to the genome were counted. Gene expression levels were measured by RPKM (reads per kilobase of exon per million reads). For comparative gene expression analysis, we used the edgeR package with general linear model (Bioconductor 3.2.4)(Robinson et al., 2010). Significant genes were selected based on a false-discovery corrected p-value (q-value) cutoff of 0.01, a fold change >2, and RPKM > 1 in either group. Gene ontology analysis was performed using GSEA software (Broad Institute) using the canonical pathway KEGG modules. Unsupervised clustering was performed using Ward's method with log2 RPKM values for each gene.

Human-mouse chimeric liver samples were aligned to custom transcriptome index comprising 21 mouse and matched human Refseq RNA sequences (see Supplemental Table 4) with Bowtie version 0.12.7 set to allow no mismatches. Only tags that uniquely aligned to a single transcript were counted. Tags counts were compiled into a matrix using custom R-scripts, which are available upon request. Tag alignment was outputted to wiggle track format to examine the distributions of tags across each gene model as quality control. Expression levels were normalized to various housekeeping genes including GUSB, GAPDH, LMNA, and BACT. RNAseq fastq files and RPKM matrix were deposited into the NCBI database under accession numbers GSE55552 and GSE58679.

### *RT-PCR*

RT-PCR was performed as previously described(Tarlow et al., 2014). Mouse primers were used at 60 °C annealing,

*Alb1* F- GCG CAGA TGA CAG GGC GGA A

*Alb1* R – GTG CCG TAG CAT GCG GGA GG

*Gapdh* F – AAG GTC GGT GTG AAC GGA TTT GG

*Gapdh* R - CGTTGAATTTGCCGTGAGTGGAG.

Human specific primers were used at 66 °C annealing

LMNA F – CCT CCT CGC CCT CCA AGA GC

LMNA R – AGA TGC GGG CAA GGA TGC AG

KRT19 F – CCT CCC GCG ACT ACA GCC ACT A

KRT19 R – CCA CTT GGC CCC TCA GCG TA.

Semiquantitative *Fah* genotyping PCR was performed at 62 °C with 3 primers

Wt – GGA TTG GGA AGA CAA TAG CAG GC

Mut – TGA GAG GAG GGT ACT GGC AGC TAC  
Com. – TTG CCT CTG AAC ATA ATG CCA AC

### *Statistics*

Calculations were performed with the Prism 6.0 statistical software package (Graphpad, Inc). Parametric pairwise or paired t-tests were performed where appropriate for image analysis data. Significance levels were defined as  $p < 0.05$ ,  $p < 0.01^*$ , or  $p < 0.001^{***}$ .

### *Supplemental References*

Grompe, M., Al-Dhalimy, M., Finegold, M., Ou, C.N., Burlingame, T., Kennaway, N.G., and Soriano, P. (1993). Loss of fumarylacetoacetate hydrolase is responsible for the neonatal hepatic dysfunction phenotype of lethal albino mice. *Genes Dev.* 7, 2298–2307.

Kopp, J.L., Dubois, C.L., Schaffer, A.E., Hao, E., Shih, H.P., Seymour, P.A., Ma, J., and Sander, M. (2011). Sox9+ ductal cells are multipotent progenitors throughout development but do not produce new endocrine cells in the normal or injured adult pancreas. *Development* 138, 653–665.

Muzumdar, M.D., Tasic, B., Miyamichi, K., Li, L., and Luo, L. (2007). A global double-fluorescent Cre reporter mouse. *Genesis* 45, 593–605.

Robinson, M.D., McCarthy, D.J., and Smyth, G.K. (2010). edgeR: a Bioconductor package for differential expression analysis of digital gene expression data. *Bioinformatics* 26, 139–140.

Snippert, H.J., van der Flier, L.G., Sato, T., van Es, J.H., van den Born, M., Kroon-Veenboer, C., Barker, N., Klein, A.M., van Rheenen, J., Simons, B.D., et al. (2010). Intestinal Crypt Homeostasis Results from Neutral Competition between Symmetrically Dividing Lgr5 Stem Cells. *Cell* 143, 134–144.

Tarlow, B.D., Finegold, M.J., and Grompe, M. (2014). Clonal tracing of Sox9+ liver progenitors in oval cell injury. *Hepatology* 60, 278-289.
